# Supplementary material for: Rambutan-like Ni/MWCNT heterostructures: Easy synthesis, formation mechanism, and controlled static magnetic and microwave electromagnetic characteristics
Source: Royal Society of Chemistry journal article supplement (doi:10.1039/c4ta00117f), 2014-01-01
Supplement: c4ta00117f1.pdf [file c4ta00117f1.pdf]

# Supporting Information

## for

### Rambutan-like Ni/MWCNT Heterostructures: Easy Synthesis, Formation Mechanism, and Controlled Static Magnetic and Microwave Electromagnetic Characteristics

Guoxiu Tong,<sup>†,\*</sup> Fangting Liu,<sup>†</sup> Wenhua Wu,<sup>†</sup> Fangfang Du,<sup>†</sup> Jianguo Guan<sup>‡</sup>

<sup>†</sup>College of Chemistry and Life Sciences, Zhejiang Normal University, Jinhua 321004, People's Republic of China

<sup>‡</sup>State Key Laboratory of Advanced Technology for Materials Synthesis and Processing, Wuhan University of Technology, Wuhan 437000, People's Republic of China

Corresponding authors. Tel.: +86-579-82282269; Fax: +86-579-82282269. E-mail address: [tonggx@zjnu.cn](mailto:tonggx@zjnu.cn) (G.X. Tong).

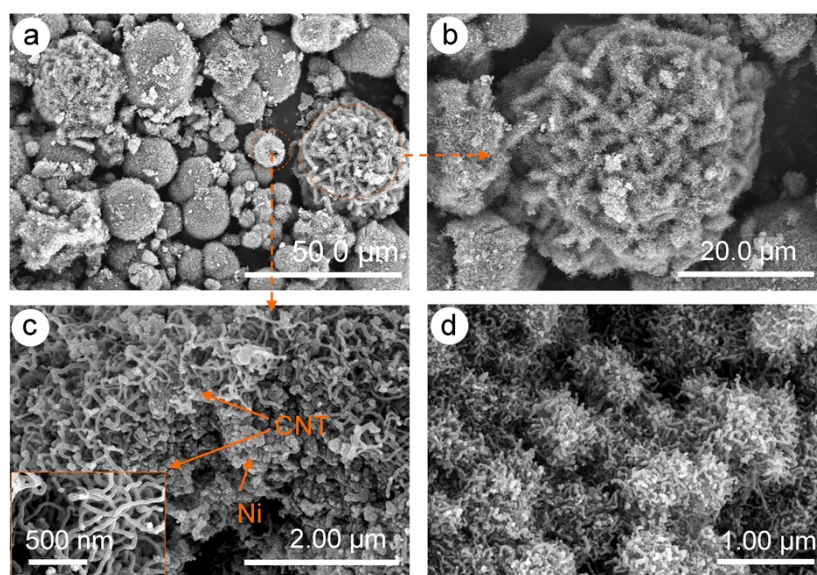

**Fig. S1** SEM images of the product obtained produced from different Ni sources at 750 °C of (a–c) Ni(OH)<sub>2</sub> and (d) NiO obtained by thermal decomposition of NiC<sub>2</sub>O<sub>4</sub> at 300 °C.

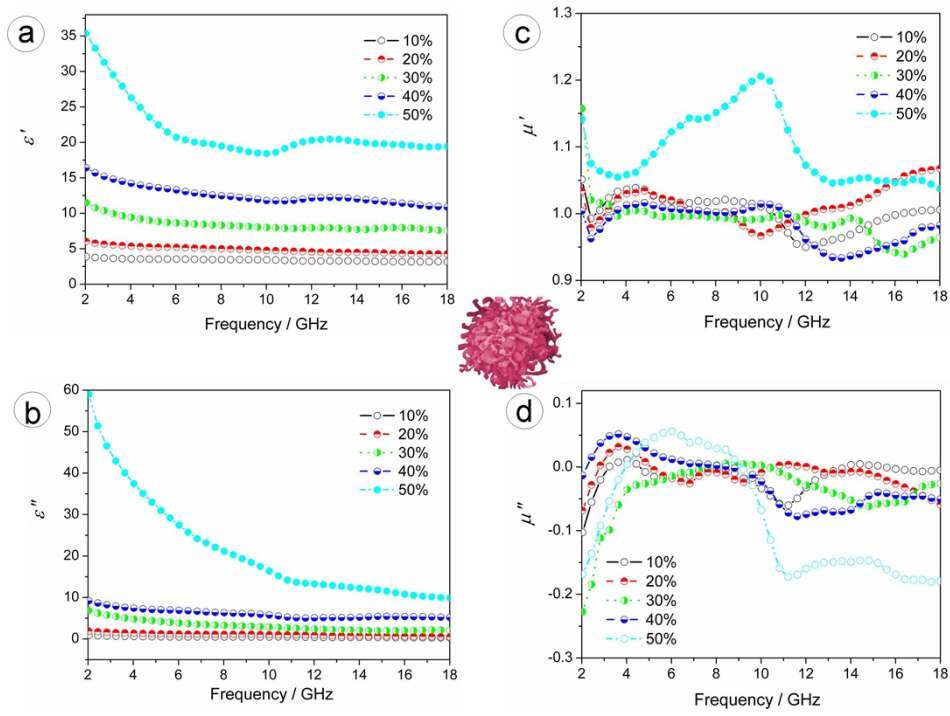

**Fig. S2** Frequency dependence of (a) real ( $\epsilon'$ ) and (b) imaginary ( $\epsilon''$ ) parts of the complex permittivity, (c) real ( $\mu'$ ) and (d) imaginary ( $\mu''$ ) parts of the complex permeability of wax composites containing various mass fractions of the typical product.
